# Supplementary material for: The Role of PNPLA3_rs738409 Gene Variant, Lifestyle Factors, and Bioactive Compounds in Nonalcoholic Fatty Liver Disease: A Population-Based and Molecular Approach towards Healthy Nutrition
Source: MDPI journal article supplement (doi:10.3390/nu16081239), 2024-04-21
Supplement: s1 [file s1]

Figure S1. Molecular docking of *PNPLA3*\_rs738409 (I148) and MT (148M) with a bioactive compound for delphinidin 3-caffeoylglucoside

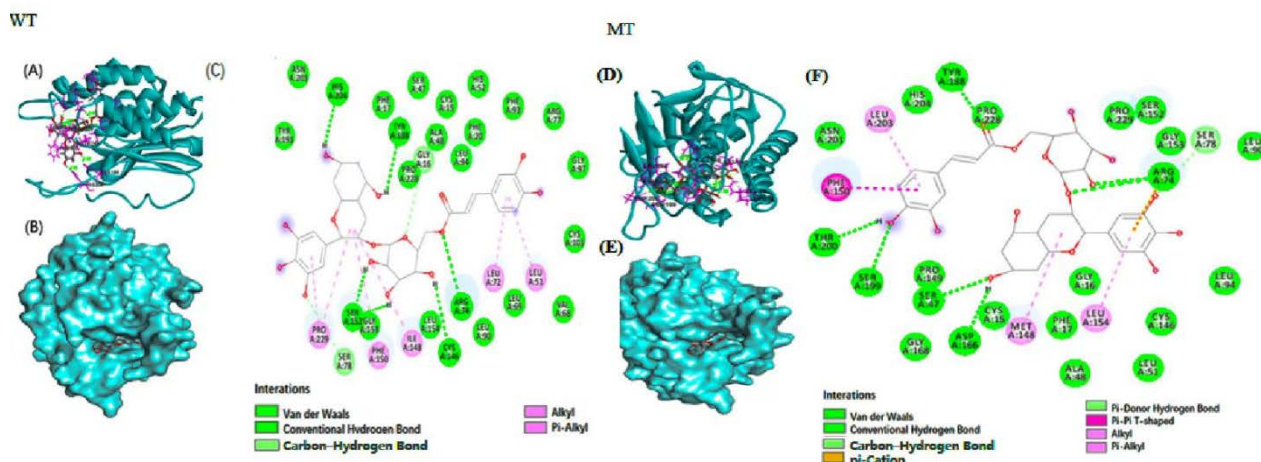

(A,D) Diagrammatic representation of the compound (ball and stick model) binding with WT and MT of *PNPLA3*, respectively. (B,E) binding of the compound at the central cavity with WT and MT of *PNPLA3*, respectively. (C,F) 2D depiction of *PNPLA3* interacting with the compound and the nature of forces involved in stabilizing–complex of bioactive compound WT and MT of *PNPLA3*, respectively. *PNPLA3*, phospholipase domain containing 3.

Figure S2. Molecular docking of *PNPLA3*\_rs738409 (I148) and MT (148M) with a bioactive compound for pyranocyanin A

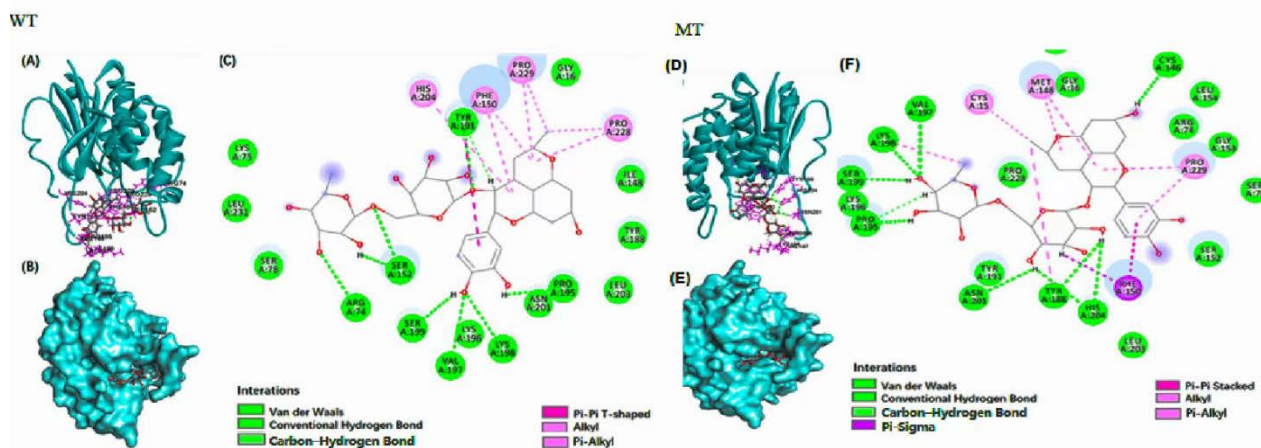

(A,D) Diagrammatic representation of the compound (ball and stick model) binding with WT and MT of *PNPLA3*, respectively. (B,E) binding of the compound at the central cavity with WT and MT of *PNPLA3*, respectively. (C,F) 2D depiction of *PNPLA3* interacting with the compound and the nature of forces involved in stabilizing–complex of bioactive compound WT and MT of *PNPLA3*, respectively. *PNPLA3*, phospholipase domain containing 3.

Figure S3. Molecular docking of *PNPLA3*\_rs738409 (I148) and MT (148M) with a bioactive compound for delta-viniferin

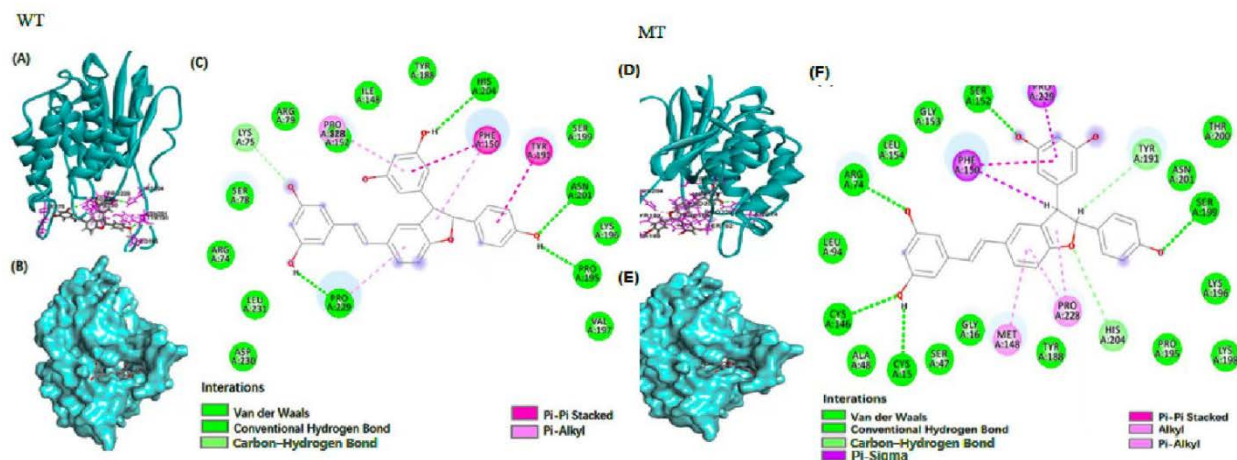

(A,D) Diagrammatic representation of the compound (ball and stick model) binding with WT and MT of *PNPLA3*, respectively. (B,E) binding of the compound at the central cavity with WT and MT of *PNPLA3*, respectively. (C,F) 2D depiction of *PNPLA3* interacting with the compound and the nature of forces involved in stabilizing—complex of bioactive compound WT and MT of *PNPLA3*, respectively. *PNPLA3*, phospholipase domain containing 3.

Figure S4. Molecular docking of *PNPLA3*\_rs738409 (I148) and MT (148M) with a bioactive compound for petunidin 3-rutinoside

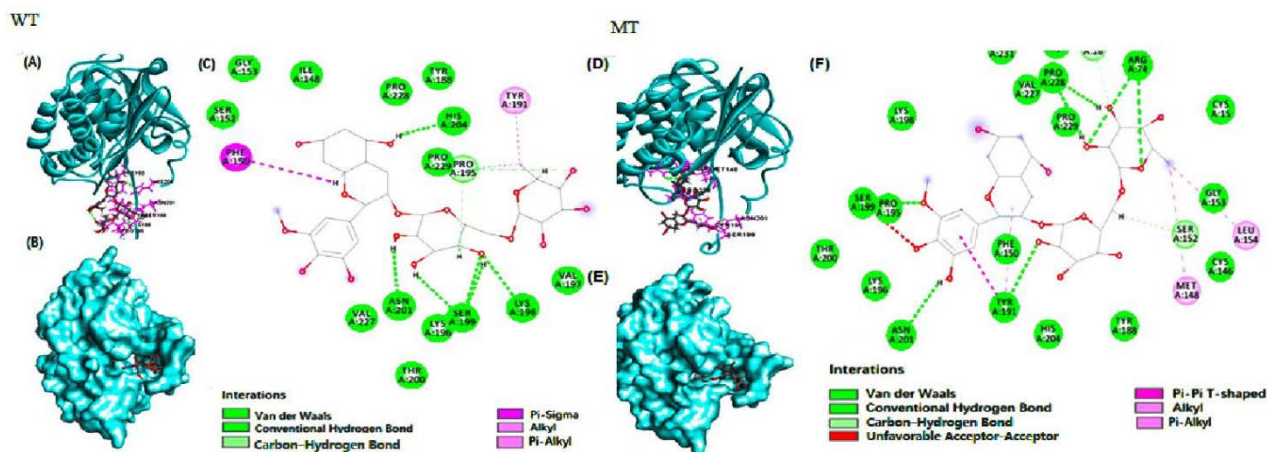

(A,D) Diagrammatic representation of the compound (ball and stick model) binding with WT and MT of *PNPLA3*, respectively. (B,E) binding of the compound at the central cavity with WT and MT of *PNPLA3*, respectively. (C,F) 2D depiction of *PNPLA3* interacting with the compound and the nature of forces involved in stabilizing—complex of bioactive compound WT and MT of *PNPLA3*, respectively. *PNPLA3*, phospholipase domain containing 3.

Figure S5. Molecular dynamics (MD) simulation of *PNPLA3*\_rs738409 (I148) and MT (148M) and delphinidin 3-caffeoylglucoside interaction.

A. RMSD (root mean square deviation)

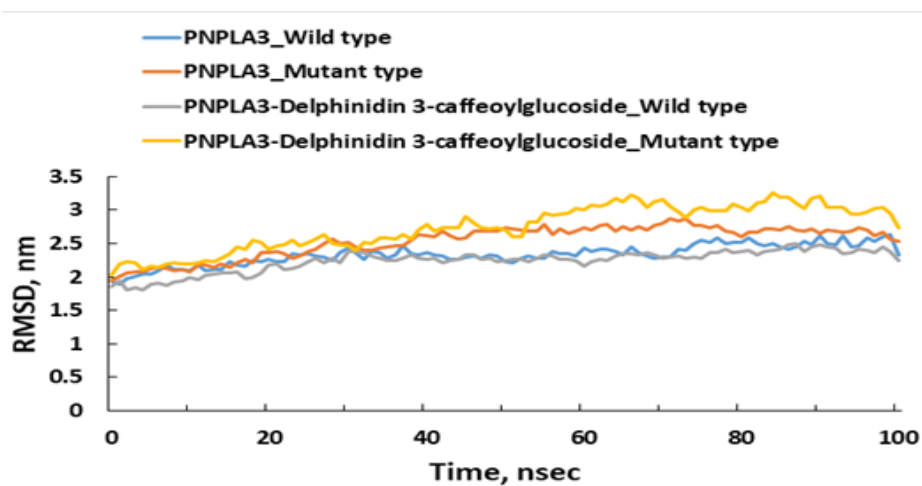

B. RMSF (root mean square fluctuation)

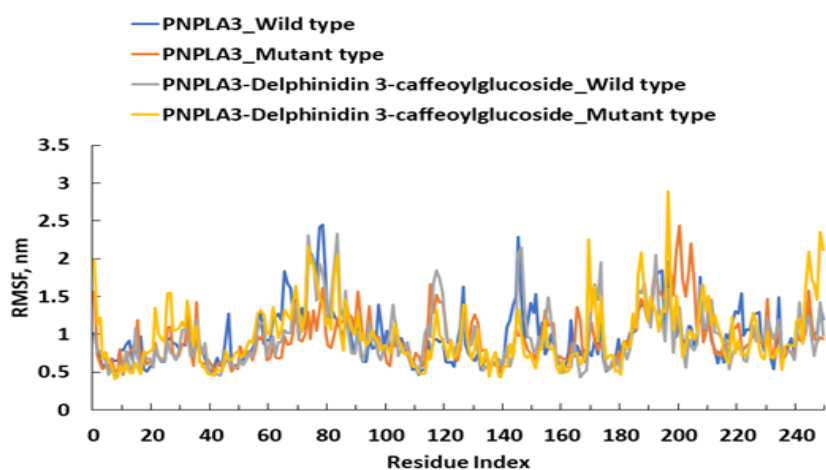

Figure S6. Molecular dynamics (MD) simulation of *PNPLA3*\_rs738409 (I148) and MT (148M) and pyranocyanin A interaction.

A. **RMSD** (root mean square deviation)

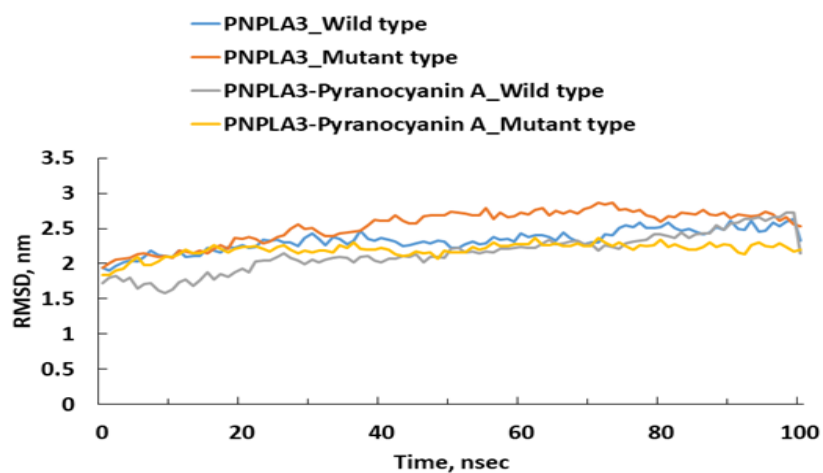

B. **RMSF** (root mean square fluctuation)

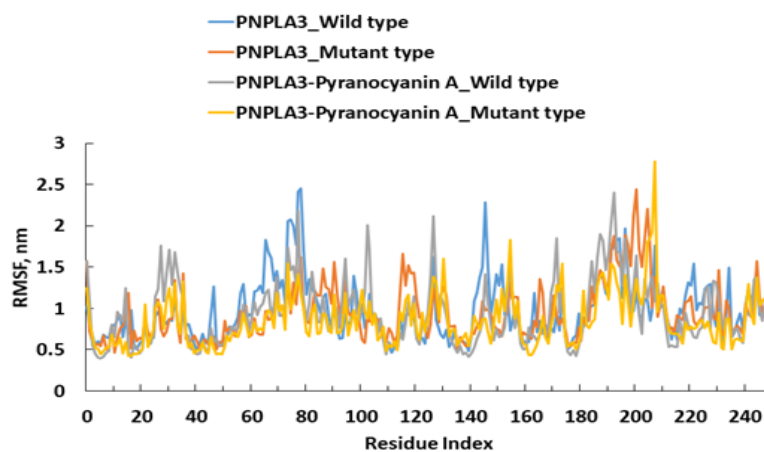

Figure S7. Molecular dynamics (MD) simulation of *PNPLA3*\_rs738409 (I148) and MT (148M) and delta-viniferin interaction.

**A. RMSD (root mean square deviation)**

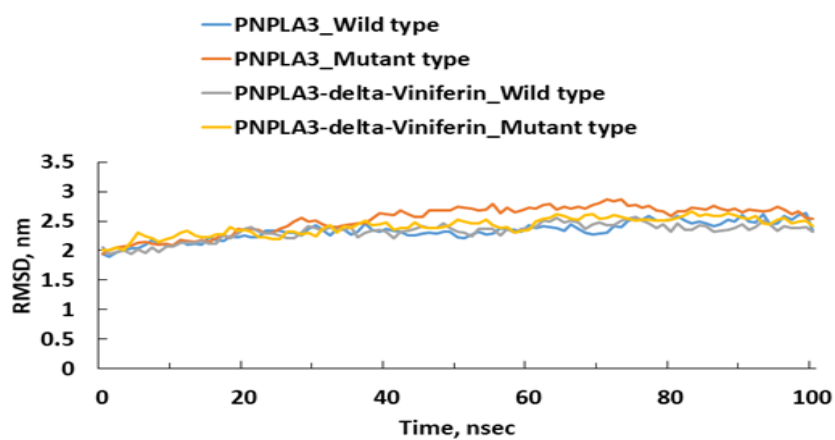

**B. RMSF (root mean square fluctuation)**

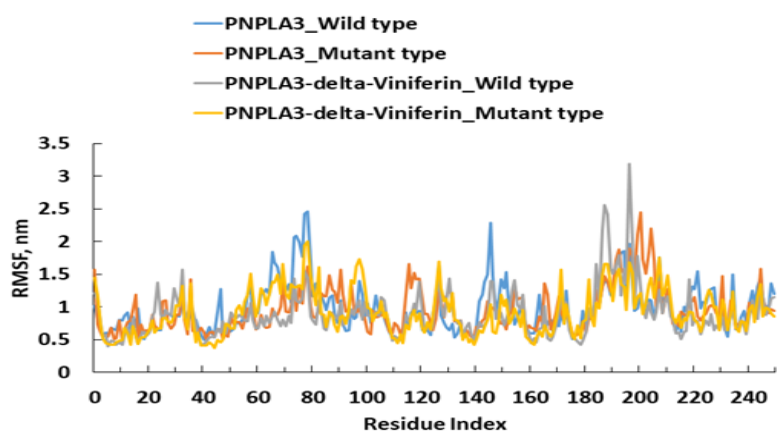

Figure S8. Molecular dynamics (MD) simulation of *PNPLA3*\_rs738409 (I148) and MT (148M) and petunidin 3-rutinoside interaction.

**A. RMSD (root mean square deviation)**

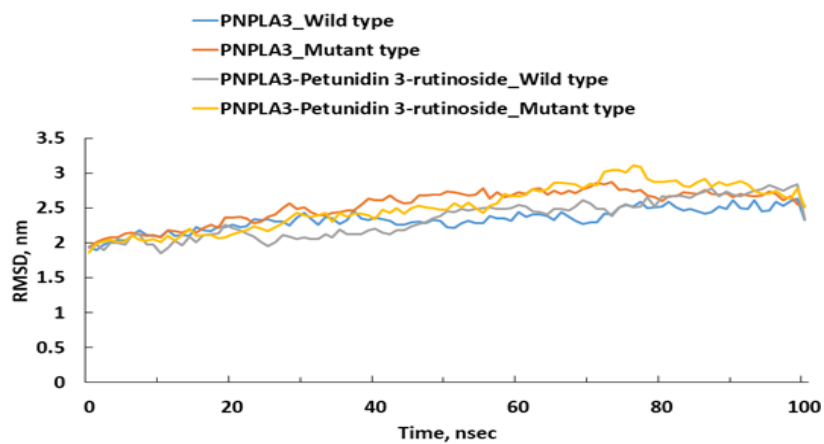

**B. RMSF (root mean square fluctuation)**

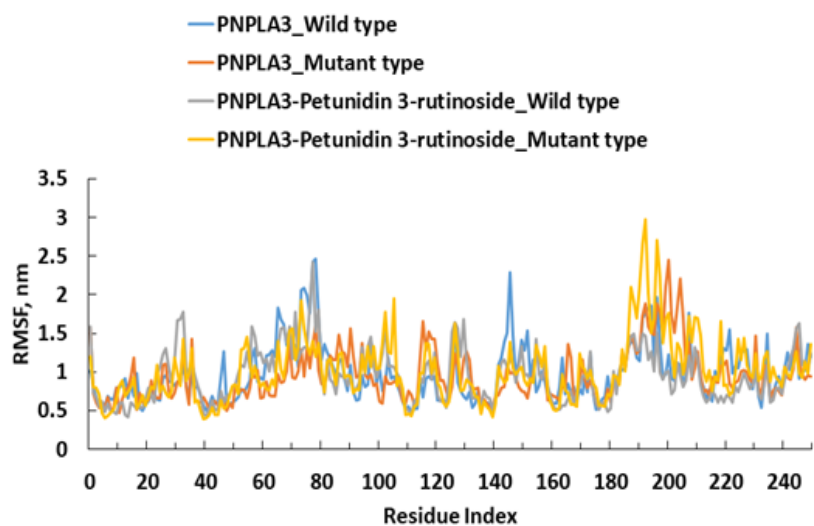

Table S1. Primer sequence used for qRT-PCR

|          |          |                       |
|----------|----------|-----------------------|
| PNPLA3   | Forward: | CTGTACCCTGCCTGTGGAAT  |
|          | Reverse: | TCGAGTGAACACCTGTGAGG  |
| SREBP-1c | Forward: | CGGAACCATCTTGGCAACAGT |
|          | Reverse: | CGCTTCTCAATGGCGTTGT   |
